# Supplementary material for: An Interplay between Oxidative Stress (Lactate Dehydrogenase) and Inflammation (Anisocytosis) Mediates COVID-19 Severity Defined by Routine Clinical Markers
Source: MDPI journal article supplement (doi:10.3390/antiox12020234), 2023-01-20
Supplement: s1 [file s1]

**Supplementary Table S1.** Approximate ranges considered standard for the clinical variables presented in this study.

| Variables                          | Normal clinical range |
|------------------------------------|-----------------------|
| Oxygen saturation (%)              | >95%                  |
| Glucose (mg/dL)                    | 70-100                |
| Anisocytosis coefficient (%)       | 11.5-15.4             |
| Prothrombin activity (s)           | 11-13.5               |
| LDH (U/L)                          | 105-333               |
| D dimer (µg/mL)                    | <0.5                  |
| AST (U/L)                          | 8-33                  |
| ALT (U/L)                          | 4-36                  |
| AST/ALT ratio                      | <1                    |
| FIB-4 index                        | <1.45                 |
| APRI index                         | <1.5                  |
| C reactive protein (mg/L)          | <10                   |
| Platelets (×10 <sup>3</sup> /µl)   | 150-400               |
| Creatinine (mg/dL)                 | 0.6-1.3               |
| Hemoglobin (g/dL)                  | 12.1-17.2             |
| Eosinophils (×10 <sup>3</sup> /µl) | <0.5                  |
| Leukocytes (×10 <sup>3</sup> /µl)  | 4.5-11                |
| Lymphocytes (×10 <sup>3</sup> /µl) | 1-4.8                 |
| Monocytes (×10 <sup>3</sup> /µl)   | 0.2-0.8               |
| Neutrophils (×10 <sup>3</sup> /µl) | 1.5-8                 |
| NLR                                | 0.78-3.53             |
